# Supplementary material
Source: Springer Nature journal article supplement (https://www.springermedizin.de/resource/supplementary/12879_2010_1167_MOESM4_ESM.PDF/9441998)
Supplement: MOESM4 [file 9441998]

## Mapping the Risk of Avian Influenza in Wild Birds in the US

### Additional File 4 – Geographic locations of AIV-positive samples in the contiguous US ( $n = 325$ )

Each sample from BioHealthBase, LaMNA, MAPS, and MAWS has a longitude and latitude. The positive samples from these sources are displayed as red points ( $n = 257$ ). Data from the USDA were assigned to counties but had no longitude and latitude. The positive samples from USDA ( $n = 68$ ) are displayed as green polygons that represent the area of the county where the sample was collected. For the regression model described in the main text, we aggregated all of the data to the county resolution.

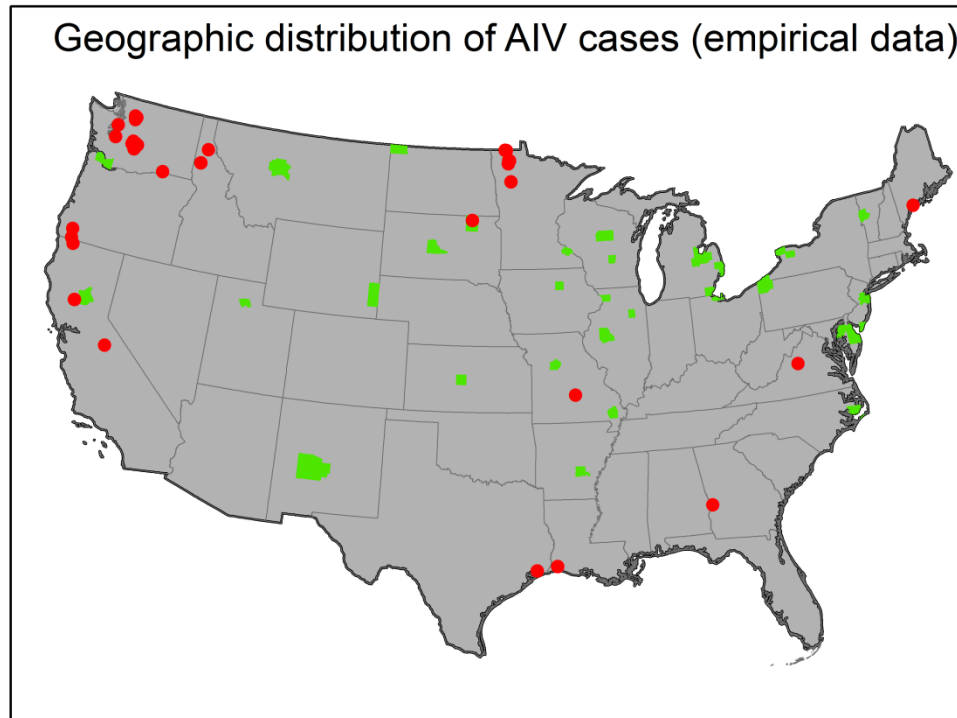

- Bird banding stations with AIV positive samples (BHB, LaMNA, MAPS, MAWS)
- Counties with AIV positive samples (USDA)
